# Supplementary material for: Kinetics of CH2OO and syn-CH3CHOO reaction with acrolein
Source: Royal Society of Chemistry journal article supplement (doi:10.1039/d1cp00492a), 2021-01-01
Supplement: d1cp00492a1.pdf [file d1cp00492a1.pdf]

## Supporting Information for

### Reactions of Criegee Intermediates with Acrolein: Kinetics and Atmospheric Implication

Xiaohu Zhou <sup>a,b,c</sup>, Yang Chen <sup>c,d,e</sup>, Yiqiang Liu <sup>c,f</sup>, Xinyong Li <sup>a,\*</sup>, Wenrui Dong<sup>c,\*</sup> and Xueming Yang<sup>c,g,\*</sup>

- a. Key Laboratory of Industrial Ecology and Environmental Engineering (Ministry of Education), School of Environmental Science and Technology, Dalian University of Technology, Dalian, 116024, China*
- b. Zhang Dayu School of Chemistry, Dalian University of Technology, Dalian, 116024, China*
- c. State Key Laboratory of Molecular Reaction Dynamics, Dalian Institute of Chemical Physics, Chinese Academy of Sciences, Dalian, 116023, China*
- d. Key Laboratory of Chemical Lasers, Dalian Institute of Chemical Physics, Chinese Academy of Sciences, Dalian, 116023, China*
- e. University of Chinese Academy of Sciences, Beijing, 100049, China*
- f. Key Laboratory of Materials Modification by Laser, Ion and Electron Beams (Ministry of Education), School of Physics, Dalian University of Technology, Dalian, 116024, China*
- g. Department of Chemistry, Southern University of Science and Technology, Shenzhen, 518055, China*

#### AUTHOR INFORMATION

##### Corresponding Author

\* E-mail: wrdong@dicp.ac.cn

\* E-mail: xmyang@dicp.ac.cn

\* E-mail: xyli@dlut.edu.cn

**Table of contents:**

|                                                                                                   |     |
|---------------------------------------------------------------------------------------------------|-----|
| I. Kinetic model for the <i>syn</i> -CH <sub>3</sub> CHOO + CH <sub>2</sub> =CHCHO reaction ..... | S3  |
| II. Summary of experimental conditions (Table S1-S2).....                                         | S4  |
| III. Error analysis (Table S3-S4) .....                                                           | S6  |
| IV. Sensitivity analysis of the fit on A <sub>1</sub> and k' <sub>14</sub> (Table S5-S7) .....    | S9  |
| Reference .....                                                                                   | S11 |

## I. Kinetic model for the *syn*-CH<sub>3</sub>CHOO + CH<sub>2</sub>=CHCHO reaction

The formation of *syn*-CH<sub>3</sub>CHOO includes reactions listed below:

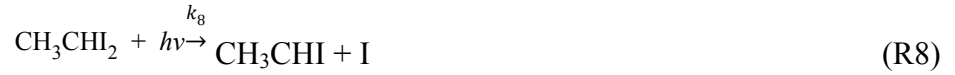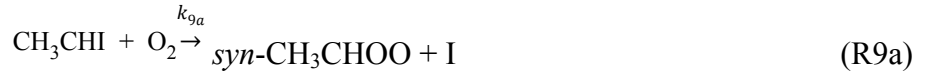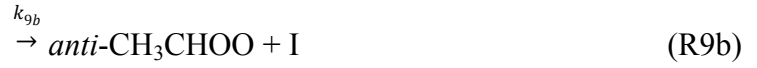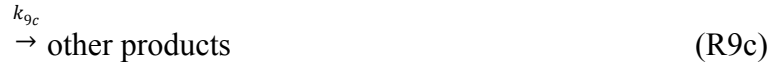

The consumption of *syn*-CH<sub>3</sub>CHOO results from the following reactions:

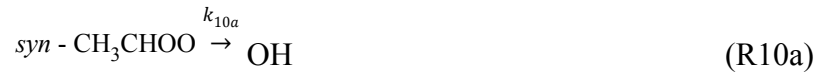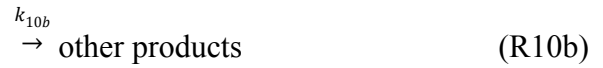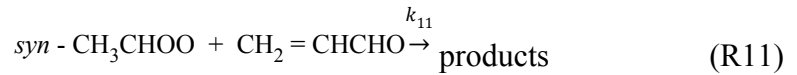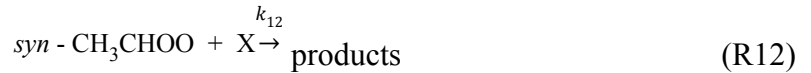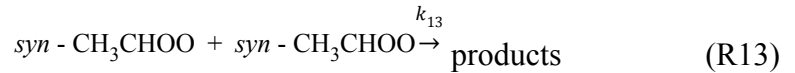

Reaction (R7) describes the consumption of OH:

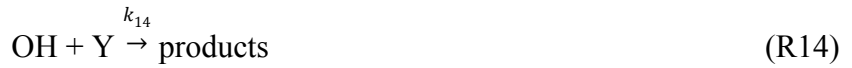

Where X in reaction (R12) denotes the species that react with *syn*-CH<sub>3</sub>CHOO, such as I and CH<sub>3</sub>CHI<sub>2</sub>. Y in reaction (R14) denotes the species that consume the OH, e.g., IO, CH<sub>3</sub>CHI<sub>2</sub>, CH<sub>3</sub>CHO, and CH<sub>2</sub>=CHCHO. We neglected the cross-self-reaction of *syn*-CH<sub>3</sub>CHOO with *anti*-CH<sub>3</sub>CHOO as it is hardly discernible under similar experimental condition.<sup>1</sup>

The OH(*v*'=0) decay profiles were fitted with the expression (II) (for details see our previous publication)<sup>2</sup>:

$$S_{\text{OH}} = \frac{A_0(k_{10} + k'_{11} + k'_{12})}{(k_{10} + k'_{11} + k'_{12})e^{(k_{10} + k'_{11} + k'_{12})t} + 2k_{13}[\textit{syn}\text{-CH}_3\text{CHOO}]_0(e^{(k_{10} + k'_{11} + k'_{12})t} - 1)} - A_1e^{-k'_{14}t} \quad (\text{SI})$$

where  $A_0 = \gamma \frac{k_{10a}[\textit{syn}\text{-CH}_3\text{CHOO}]_0}{k'_{14} - (k_{10} + k'_{11} + k'_{12})}$ ,  $A_1 = \gamma \left( \frac{k_{10a}[\textit{syn}\text{-CH}_3\text{CHOO}]_0}{k'_{14} - (k_{10} + k'_{11} + k'_{12})} - [\text{OH}]_0 \right)$ .

In expression (II),  $k'_{11} = k_{11}[\text{CH}_2=\text{CHCHO}]$ ;  $k'_{12} = k_{12}[\text{X}]$ ;  $k'_{13}$  was fixed to a reported value of  $1.6 \times 10^{-10} \text{ cm}^3 \text{ s}^{-1}$ ,  $k'_{14} = k_{14}[\text{Y}]$ . The initial concentration of *syn*-CH<sub>3</sub>CHOO,  $[\textit{syn}\text{-CH}_3\text{CHOO}]_0$ , was fixed to

a calculated value during the fitting.  $[\text{OH}]_0$  is the concentration of OH from the decomposition of energized  $\text{CH}_3\text{CHOO}$ ;  $\gamma$  is the OH detection efficiency.

## II. Summary of experimental conditions

**Table S1.** Summary of the experimental conditions for  $\text{CH}_2\text{OO}$  reaction with  $\text{CH}_2=\text{CHCHO}$  at different temperatures. The total pressure is 10 Torr;  $[\text{CH}_2\text{I}_2] \sim (1.54 \pm 0.18) \times 10^{14} \text{ cm}^{-3}$ ;  $[\text{CH}_2\text{OO}] \sim (3.59 \pm 0.86) \times 10^{12} \text{ cm}^{-3}$ ;  $[\text{O}_2] = 2.50 \times 10^{16} \text{ cm}^{-3}$ ;  $I_{248} \sim 15 \text{ mJ cm}^{-2}$ .

| Exp #   | T<br>/ K | $k_3 + k'_6$<br>/ $\text{s}^{-1}$ | $k_5$<br>/ $10^{-12} \text{ cm}^3 \text{ s}^{-1}$ |
|---------|----------|-----------------------------------|---------------------------------------------------|
| 1-1     | 281.3    | 451                               | $1.80 \pm 0.23$                                   |
| 1-2     | 281.5    | 480                               | $1.80 \pm 0.22$                                   |
| 1-3     | 281.2    | 514                               | $1.87 \pm 0.23$                                   |
| 1-4     | 281.3    | 422                               | $1.85 \pm 0.23$                                   |
| Average |          |                                   | <b><math>1.83 \pm 0.23</math></b>                 |
| 1-5     | 298.4    | 427                               | $1.61 \pm 0.20$                                   |
| 1-6     | 298.3    | 584                               | $1.64 \pm 0.20$                                   |
| 1-7     | 298.5    | 673                               | $1.69 \pm 0.21$                                   |
| 1-8     | 298.4    | 504                               | $1.60 \pm 0.20$                                   |
| Average |          |                                   | <b><math>1.64 \pm 0.20</math></b>                 |
| 1-9     | 308.5    | 520                               | $1.35 \pm 0.17$                                   |
| 1-10    | 308.1    | 504                               | $1.45 \pm 0.17$                                   |
| 1-11    | 308.4    | 476                               | $1.39 \pm 0.18$                                   |
| 1-12    | 308.2    | 445                               | $1.47 \pm 0.18$                                   |
| Average |          |                                   | <b><math>1.42 \pm 0.17</math></b>                 |
| 1-13    | 318.1    | 405                               | $1.25 \pm 0.15$                                   |
| 1-14    | 318.5    | 413                               | $1.31 \pm 0.16$                                   |
| 1-15    | 318.2    | 599                               | $1.36 \pm 0.17$                                   |
| 1-16    | 318.1    | 467                               | $1.35 \pm 0.17$                                   |
| Average |          |                                   | <b><math>1.32 \pm 0.16</math></b>                 |

**Table S2.** Summary of the experimental conditions for *syn*-CH<sub>3</sub>CHOO reaction with CH<sub>2</sub>=CHCHO at different temperatures. The total pressure is 15 Torr; [CH<sub>3</sub>CHI<sub>2</sub>]~ (1.30 ± 0.16) × 10<sup>14</sup> cm<sup>-3</sup>; [*syn*-CH<sub>3</sub>CHOO] ~ (2.44 ± 0.75) × 10<sup>12</sup> cm<sup>-3</sup>; [O<sub>2</sub>] = 2.50 × 10<sup>16</sup> cm<sup>-3</sup>; I<sub>248</sub> ~15 mJ cm<sup>-2</sup>.

| Exp #   | <i>T</i><br>/ K | <i>k</i> <sub>10</sub> + <i>k</i> ' <sub>12</sub><br>/ s <sup>-1</sup> | <i>k</i> <sub>11</sub><br>/10 <sup>-13</sup> cm <sup>3</sup> s <sup>-1</sup> |
|---------|-----------------|------------------------------------------------------------------------|------------------------------------------------------------------------------|
| 2-1     | 282.9           | 456                                                                    | 1.38 ± 0.23                                                                  |
| 2-2     | 282.8           | 439                                                                    | 1.29 ± 0.19                                                                  |
| 2-3     | 282.8           | 424                                                                    | 1.33 ± 0.23                                                                  |
| 2-4     | 282.7           | 353                                                                    | 1.42 ± 0.22                                                                  |
| Average |                 |                                                                        | <b>1.36 ± 0.21</b>                                                           |
| 2-5     | 298.5           | 296                                                                    | 1.33 ± 0.19                                                                  |
| 2-6     | 298.4           | 537                                                                    | 1.22 ± 0.23                                                                  |
| 2-7     | 298.3           | 313                                                                    | 1.25 ± 0.23                                                                  |
| 2-8     | 298.3           | 543                                                                    | 1.19 ± 0.19                                                                  |
| 2-9     | 298.1           | 451                                                                    | 1.24 ± 0.17                                                                  |
| Average |                 |                                                                        | <b>1.25 ± 0.21</b>                                                           |
| 2-10    | 308.3           | 257                                                                    | 1.18 ± 0.22                                                                  |
| 2-11    | 308.7           | 303                                                                    | 1.04 ± 0.21                                                                  |
| 2-12    | 308.6           | 324                                                                    | 1.19 ± 0.18                                                                  |
| 2-13    | 308.2           | 301                                                                    | 1.16 ± 0.18                                                                  |
| Average |                 |                                                                        | <b>1.14 ± 0.19</b>                                                           |
| 2-14    | 318.5           | 283                                                                    | 1.03 ± 0.16                                                                  |
| 2-15    | 318.3           | 374                                                                    | 0.86 ± 0.14                                                                  |
| 2-16    | 318.3           | 284                                                                    | 1.11 ± 0.18                                                                  |
| 2-17    | 318.0           | 361                                                                    | 1.00 ± 0.15                                                                  |
| Average |                 |                                                                        | <b>1.00 ± 0.16</b>                                                           |

### III. Error analysis

The overall errors for the rate coefficients  $k_5$  and  $k_{11}$ , as shown in Table S1 and S2, are determined as follow:

#### a) The estimation of $[\text{CH}_2\text{OO}]_0$ and $[\text{syn-CH}_3\text{CHOO}]_0$

$[\text{CH}_2\text{OO}]_0$  and  $[\text{syn-CH}_3\text{CHOO}]_0$  was calculated as  $y \times f \times b \times [\text{CH}_2\text{I}_2]_0$  (or  $[\text{CH}_3\text{CHI}_2]_0$ ).

$y$  is the fraction of  $\text{CH}_2\text{I}_2/\text{CH}_3\text{CHI}_2$  that were photolyzed by 248 nm laser and it was calculated as  $(F/h\nu_{248}) \times \sigma_{248}$ .  $F$  denotes the laser fluence (0.5 cm beam diameter), and  $\sigma_{248}$  is the absorption cross-section of  $\text{CH}_2\text{I}_2/\text{CH}_3\text{CHI}_2$  at 248 nm ( $1.61 \times 10^{-18}$  and  $1.57 \times 10^{-18}$   $\text{cm}^2 \text{ molecule}^{-1}$ ).<sup>3</sup> In the current experimental condition,  $y$  is about 3%.

$f$  is the fractional yield of  $\text{CH}_2\text{OO}/\text{CH}_3\text{CHOO}$  from the reaction of  $\text{CH}_2\text{I}/\text{CH}_3\text{CHI}$  with  $\text{O}_2$ , which was pressure-dependent.<sup>4</sup> The yield of  $\text{CH}_2\text{OO}$  was reported to be ca. 0.76 at 7.6 Torr and 0.52 at 200 Torr.<sup>4</sup> For the  $\text{CH}_3\text{CHOO}$ , the fractional yield was reported as  $0.86 \pm 0.11$  at 2 Torr<sup>5</sup> and 0.9 at pressures between 5 and 20 Torr,<sup>6</sup> but no available knowledge about the  $f$  at higher pressure was reported and therefore we adopted a value of 0.9 for  $f$  at 5-150 Torr pressure range.

$b$  is the ratio of  $[\text{syn-CH}_3\text{CHOO}]$  to  $[\text{CH}_3\text{CHOO}]$  (the existence of *anti-CH}\_3\text{CHOO}*). This value was estimated to be 0.7.<sup>6</sup> This value is 1 for  $\text{CH}_2\text{OO}$ .

The  $[\text{CH}_2\text{I}_2]_0 / [\text{CH}_3\text{CHI}_2]_0$  was measured by a deep UV LED (DUV325-H46, Roithner Lasertechnik, centered at 322.4 nm) and a balanced amplified photodetector (PDB450A, Thorlabs), with known absorption cross-section and LED emission profile.

#### b) Error analysis

Considering errors in the measurement of flow rate (1%), pressure (3%), temperature (1%), the fluence of the LED light source (10%) and the UV absorption cross-section of  $\text{CH}_2\text{I}_2$  (5%), we estimated the errors of  $[\text{CH}_2\text{I}_2]$  to be 12%. With the errors of the fractional yield of  $\text{CH}_2\text{OO}$  from the  $\text{CH}_2\text{I} + \text{O}_2$  reaction (20%), the fluence of photolysis laser (5%), the UV absorption cross-section of  $\text{CH}_2\text{I}_2$  at 248 nm (5%) and  $[\text{CH}_2\text{I}_2]$  (12%), the uncertainty of  $[\text{CH}_2\text{OO}]_0$  was calculated to be 24%.

Similarly, considering the errors of  $[\text{CH}_3\text{CHI}_2]$  (12%), the errors of the fractional yield of  $\text{CH}_3\text{CHOO}$  from the  $\text{CH}_3\text{CHI} + \text{O}_2$  reaction (20%), the branching of *syn-CH}\_3\text{CHOO}* (20%), the fluence of photolysis laser (5%), and the UV absorption cross-section of  $\text{CH}_3\text{CHI}_2$  at 248 nm (5%). we estimated the uncertainty of  $[\text{syn-CH}_3\text{CHOO}]_0$  to be 31%.

During fitting the OH decay profiles, the  $\text{CH}_2\text{OO}$  self-reaction rate coefficient,  $k_4$ , was fixed to  $8 \times 10^{-11}$   $\text{cm}^3 \text{ s}^{-1}$ , the uncertainty of which was estimated to be 50%.<sup>4</sup> And the *syn-CH}\_3\text{CHOO}* self-reaction rate coefficient was fixed to  $1.6 \times 10^{-10}$   $\text{cm}^3 \text{ s}^{-1}$  with uncertainty of 33%.<sup>1</sup> Therefore, the error of  $[\text{CH}_2\text{OO}]_0 \times$

$k_4$  and  $[\text{syn-CH}_3\text{CHOO}]_0 \times k_{13}$  is about 56% and 46%, respectively. Table S3 and S4 shows the values of  $k_5$  and  $k_{11}$  when varying the value of  $[\text{CH}_2\text{OO}]_0 \times k_4$  and  $[\text{syn-CH}_3\text{CHOO}]_0 \times k_{13}$ . According to Table S2 and S3, we estimated the error of  $k_5$  and  $k_{11}$  caused by the uncertainty of  $[\text{CH}_2\text{OO}]_0 \times k_4$  and  $[\text{syn-CH}_3\text{CHOO}]_0 \times k_{13}$  to be 5% and 8%, respectively.

For the reaction of  $\text{CH}_2\text{OO}$  with  $\text{CH}_2=\text{CHCHO}$ , considering the errors from fitting the OH decay profiles (5%), the linear fits (1%-14%) that depend on the total pressure, the absolute  $[\text{CH}_2=\text{CHCHO}]$  (10%) and the error of  $k_5$  caused by the uncertainty of  $[\text{CH}_2\text{OO}]_0 \times k_6$  (5%), the overall error of  $k_5$  was estimated to be 12-19%. Similarly, we estimated the overall error of the  $k_{11}$  for the reaction of *syn*- $\text{CH}_3\text{CHOO}$  with  $\text{CH}_2=\text{CHCHO}$  to be 15-20%.

**Table S3.** The error of  $k_5$  resulting from the 56% uncertainty of  $[\text{CH}_2\text{OO}]_0 \times k_4$ .

| Exp #          | $[\text{CH}_2\text{OO}]_0 \times k_4 / \text{s}^{-1}$ | $[\text{CH}_2\text{OO}]_0 \times k_4 \times (1 \pm 56\%) / \text{s}^{-1}$ | $k_5 / 10^{-12} \text{ cm}^3 \text{ s}^{-1}$ | $k_5 / 10^{-12} \text{ cm}^3 \text{ s}^{-1}$ | Uncertainty / %  |
|----------------|-------------------------------------------------------|---------------------------------------------------------------------------|----------------------------------------------|----------------------------------------------|------------------|
| 1-1            | 287                                                   | 445 <sup>a</sup>                                                          | 1.78 <sup>a</sup>                            | 1.80                                         | 1.1 <sup>a</sup> |
|                |                                                       | 129 <sup>b</sup>                                                          | 1.81 <sup>b</sup>                            |                                              | 0.6 <sup>b</sup> |
| 1-5            | 287                                                   | 445                                                                       | 1.58                                         | 1.61                                         | 1.9              |
|                |                                                       | 129                                                                       | 1.63                                         |                                              | 1.2              |
| 1-9            | 287                                                   | 445                                                                       | 1.34                                         | 1.35                                         | 0.7              |
|                |                                                       | 129                                                                       | 1.36                                         |                                              | 0.7              |
| 1-13           | 287                                                   | 445                                                                       | 1.22                                         | 1.25                                         | 2.4              |
|                |                                                       | 129                                                                       | 1.34                                         |                                              | 7.2              |
| 3 <sub>a</sub> | 280                                                   | 434                                                                       | 1.97                                         | 2.05                                         | 3.9              |
|                |                                                       | 126                                                                       | 2.12                                         |                                              | 3.4              |
| 3 <sub>d</sub> | 294                                                   | 455                                                                       | 1.33                                         | 1.38                                         | 3.6              |
|                |                                                       | 132                                                                       | 1.47                                         |                                              | 6.5              |
| 3 <sub>f</sub> | 279                                                   | 433                                                                       | 1.58                                         | 1.59                                         | 0.6              |
|                |                                                       | 126                                                                       | 1.60                                         |                                              | 0.6              |
| 3 <sub>h</sub> | 274                                                   | 424                                                                       | 1.56                                         | 1.66                                         | 6.0              |
|                |                                                       | 123                                                                       | 1.73                                         |                                              | 4.2              |

<sup>a</sup> The data highlighted in yellow shows the values and uncertainties of  $k_4$  when fixing the  $[\text{CH}_2\text{OO}]_0 \times k_4$  to

its upper-limit value,  $(1.56 \times [\text{CH}_2\text{OO}]_0 \times k_4)$ .

<sup>b</sup> The data highlighted in grey shows the values and uncertainties of  $k_4$  when fixing the  $[\text{CH}_2\text{OO}]_0 \times k_4$  to its lower-limit value,  $(0.44 \times [\text{CH}_2\text{OO}]_0 \times k_4)$ .

**Table S4.** The error of  $k_{11}$  resulting from the 46% uncertainty of  $[\text{syn-CH}_3\text{CHOO}]_0 \times k_{13}$ .

| Exp #          | $[\text{syn-CH}_3\text{CHOO}]_0 \times k_{13} / \text{s}^{-1}$ | $[\text{syn-CH}_3\text{CHOO}]_0 \times k_{13} \times (1 \pm 46\%) / \text{s}^{-1}$ | $k_{11} / 10^{-13} \text{ cm}^3 \text{ s}^{-1}$ | $k_{11} / 10^{-13} \text{ cm}^3 \text{ s}^{-1}$ | Uncertainty / %  |
|----------------|----------------------------------------------------------------|------------------------------------------------------------------------------------|-------------------------------------------------|-------------------------------------------------|------------------|
| 2-2            | 390                                                            | 570 <sup>a</sup>                                                                   | 1.27 <sup>a</sup>                               | 1.29                                            | 1.6 <sup>a</sup> |
|                |                                                                | 211 <sup>b</sup>                                                                   | 1.36 <sup>b</sup>                               |                                                 | 5.4 <sup>b</sup> |
| 2-9            | 390                                                            | 570                                                                                | 1.22                                            | 1.24                                            | 1.6              |
|                |                                                                | 211                                                                                | 1.27                                            |                                                 | 2.4              |
| 2-13           | 390                                                            | 570                                                                                | 1.11                                            | 1.16                                            | 4.3              |
|                |                                                                | 211                                                                                | 1.17                                            |                                                 | 0.9              |
| 2-14           | 390                                                            | 570                                                                                | 0.92                                            | 1.03                                            | 10               |
|                |                                                                | 211                                                                                | 1.06                                            |                                                 | 2.9              |
| 4 <sub>a</sub> | 477                                                            | 696                                                                                | 1.30                                            | 1.34                                            | 3                |
|                |                                                                | 257                                                                                | 1.43                                            |                                                 | 6.7              |
| 4 <sub>e</sub> | 426                                                            | 621                                                                                | 1.07                                            | 1.17                                            | 8.5              |
|                |                                                                | 230                                                                                | 1.18                                            |                                                 | 1                |
| 4 <sub>g</sub> | 504                                                            | 736                                                                                | 0.99                                            | 1.05                                            | 5.7              |
|                |                                                                | 272                                                                                | 1.16                                            |                                                 | 10               |
| 4 <sub>i</sub> | 482                                                            | 703                                                                                | 1.17                                            | 1.31                                            | 10               |
|                |                                                                | 260                                                                                | 1.43                                            |                                                 | 9.2              |

<sup>a</sup> The data highlighted in yellow shows the values and uncertainties of  $k_{13}$  when fixing the  $[\text{syn-CH}_3\text{CHOO}]_0 \times k_{13}$  to its upper-limit value,  $(1.46 \times [\text{syn-CH}_3\text{CHOO}]_0 \times k_{13})$ .

<sup>b</sup> The data highlighted in grey shows the values and uncertainties of  $k_{13}$  when fixing the  $[\text{syn-CH}_3\text{CHOO}]_0 \times k_{13}$  to its lower-limit value,  $(0.54 \times [\text{syn-CH}_3\text{CHOO}]_0 \times k_{13})$ .



#### IV. Sensitivity analysis of the fit on $A_1$ and $k'_{14}$

During fits the OH time-dependent profiles of *syn*-CH<sub>3</sub>CHOO + CH<sub>2</sub>=CHCHO reaction, the parameters of  $A_0$ ,  $A_1$ ,  $k_{10} + k'_{11} + k'_{12}$  (corresponding to the  $k_3 + k'_5 + k'_6$  in the CH<sub>2</sub>OO + CH<sub>2</sub>=CHCHO reaction), and  $k'_{14}$  (the overall loss rate of OH) were floated. The fits are not sensitive to either  $A_1$  or  $k'_{14}$ , as shown in Table S5-S7.

OH is expected to be consumed mainly by reacting with CH<sub>3</sub>CHI<sub>2</sub> and acrolein. Thus, the predicted  $k'_{14}$  value can be calculated as follows:

$$k'_{14} = k_{\text{CH}_3\text{CHI}_2}[\text{CH}_3\text{CHI}_2] + k_{\text{acrolein}}[\text{acrolein}] \quad (\text{SII})$$

where, the  $k_{\text{CH}_3\text{CHI}_2}$  and  $k_{\text{acrolein}}$  are the rate coefficient for OH + CH<sub>3</sub>CHI<sub>2</sub> and OH + acrolein reaction, respectively.  $k_{\text{CH}_3\text{CHI}_2}$  is not available; we take the rate coefficient for OH + CH<sub>2</sub>I<sub>2</sub> reaction(  $(4.45 \pm 0.32) \times 10^{-12} \text{ cm}^3 \text{ s}^{-1}$  ) as a reference.<sup>7</sup> The values of  $k_{\text{acrolein}}$  was reported to be  $(1.99 \pm 0.24) \times 10^{-11} \text{ cm}^3 \text{ s}^{-1}$ .<sup>8</sup>

The fitted values of  $A_0$ ,  $A_1$ ,  $k_{10} + k'_{11} + k'_{12}$ —with  $k'_{14}$  floated or fixed to the calculated values—are listed in Table S5. It shows that the fitted values of  $A_0$  and  $k_{10} + k'_{11} + k'_{12}$  did not change when  $k'_{14}$  were either floated or fixed to calculated values. This is because the decrease portion of OH profiles is mainly described by the first term of eqn (SI).<sup>2</sup> Table S5 also shows that the output values of  $A_1$  are exceptionally small when  $k'_{14}$  were fixed to calculated values. This could be because the fits are not sensitive to  $A_1$ . We fixed  $k'_{14}$  to calculated values and fixed  $A_1$  to different values, as shown in Table S6 and Table S7. It shows that the  $k_{10} + k'_{11} + k'_{12}$  barely change when increasing  $A_1$  from 0 to 500 ( $[\text{acrolein}] \sim 0.37 \times 10^{15} \text{ cm}^{-3}$ ) and 0 to 5000 ( $[\text{acrolein}] \sim 2.4 \times 10^{15} \text{ cm}^{-3}$ ).

**Table S5.** The fitted values of  $A_0$ ,  $A_1$ ,  $k_{10} + k_{11} + k_{12}$ —with  $k'_{14}$  floated or fixed to the calculated values. The total pressure is 15 Torr;  $[\text{CH}_3\text{CHI}_2] \sim (1.30 \pm 0.16) \times 10^{14} \text{ cm}^{-3}$ ;  $[\text{syn-CH}_3\text{CHOO}] \sim (2.44 \pm 0.75) \times 10^{12} \text{ cm}^{-3}$ ;  $[\text{O}_2] = 2.50 \times 10^{16} \text{ cm}^{-3}$ ;  $I_{248} \sim 15 \text{ mJ cm}^{-2}$ .

| Exp # | [acrolein]<br>/ $10^{15} \text{ cm}^{-3}$ | $A_0, A_1, k_{10} + k_{11} + k_{12}$ and $k'_{14}$ are floated |       |       |                                                 |                    | $k'_{14}$ <sup>a</sup><br>(calculated)<br>/ $\text{s}^{-1}$ | fix $k'_{14}$ to calculated value |         |                                                 |       |
|-------|-------------------------------------------|----------------------------------------------------------------|-------|-------|-------------------------------------------------|--------------------|-------------------------------------------------------------|-----------------------------------|---------|-------------------------------------------------|-------|
|       |                                           | $k'_{14}$<br>/ $\text{s}^{-1}$                                 | $A_0$ | $A_1$ | $k_{10} + k_{11} + k_{12}$<br>/ $\text{s}^{-1}$ | $R^2$ <sup>b</sup> |                                                             | $A_0$                             | $A_1$   | $k_{10} + k_{11} + k_{12}$<br>/ $\text{s}^{-1}$ | $R^2$ |
| 2-9-1 | 0.37                                      | 385910                                                         | 22433 | 28970 | 500                                             | 0.997              | 7957                                                        | 22433                             | 2.8E-12 | 500                                             | 0.997 |
| 2-9-2 | 0.74                                      | 401190                                                         | 19845 | 77478 | 543                                             | 0.998              | 15337                                                       | 19845                             | 3.2E-12 | 543                                             | 0.997 |
| 2-9-3 | 1.12                                      | 768250                                                         | 17703 | 77605 | 590                                             | 0.998              | 22717                                                       | 17703                             | 2.3E-12 | 590                                             | 0.998 |
| 2-9-4 | 1.49                                      | 690600                                                         | 15069 | 32855 | 632                                             | 0.998              | 30097                                                       | 15069                             | 6.8E-13 | 632                                             | 0.998 |
| 2-9-5 | 1.87                                      | 553220                                                         | 13318 | 36460 | 684                                             | 0.998              | 37477                                                       | 13318                             | 6.5E-11 | 684                                             | 0.998 |
| 2-9-6 | 2.42                                      | 436140                                                         | 10202 | 16520 | 755                                             | 0.997              | 44857                                                       | 10202                             | 4.9E-11 | 755                                             | 0.997 |

a. the values of  $k'_{14}$  are calculated from eqn (SII).

b.  $R^2$  is the coefficient of determination of the fits.

**Table S6.** The fitted values of  $k_{10} + k_{11} + k_{12}$  when fixed  $k'_{14}$  to calculated values and fixed  $A_1$  to different values. The total pressure is 15 Torr;  $[\text{CH}_3\text{CHI}_2] \sim (1.30 \pm 0.16) \times 10^{14} \text{ cm}^{-3}$ ;  $[\text{syn-CH}_3\text{CHOO}] \sim (2.44 \pm 0.75) \times 10^{12} \text{ cm}^{-3}$ ;  $[\text{O}_2] = 2.50 \times 10^{16} \text{ cm}^{-3}$ ;  $[\text{CH}_2=\text{CHCHO}] \sim 3.70 \times 10^{14} \text{ cm}^{-3}$ ;  $I_{248} \sim 15 \text{ mJ cm}^{-2}$ .

| Exp # | $(k_{10} + k_{11} + k_{12}) \text{ s}^{-1}$ <sup>a</sup> | $A_1$<br>(fix) | fix $A_1$ and $k'_{14}$<br>$k'_{14} = 7957 \text{ s}^{-1}$ |                                                 |       |
|-------|----------------------------------------------------------|----------------|------------------------------------------------------------|-------------------------------------------------|-------|
|       |                                                          |                | $A_0$                                                      | $k_{10} + k_{11} + k_{12}$<br>/ $\text{s}^{-1}$ | $R^2$ |
| 2-9-1 | 500                                                      | 0              | 22433                                                      | 500                                             | 0.997 |
|       |                                                          | 500            | 22562                                                      | 504                                             | 0.997 |
|       |                                                          | 1000           | 22692                                                      | 509                                             | 0.997 |

|  |  |      |       |     |       |
|--|--|------|-------|-----|-------|
|  |  | 2000 | 22956 | 519 | 0.996 |
|  |  | 4000 | 23495 | 539 | 0.995 |

a. the fitted value of  $k_{10} + k'_{11} + k'_{12}$  when  $A_0$ ,  $A_1$ ,  $k_{10} + k'_{11} + k'_{12}$  and  $k'_{14}$  are floated during the fit.

**Table S7.** The fitted values of  $k_{10} + k'_{11} + k'_{12}$  when fixed  $k'_{14}$  to calculated values and fixed  $A_1$  to different values. The total pressure is 15 Torr;  $[\text{CH}_3\text{CHI}_2] \sim (1.30 \pm 0.16) \times 10^{14} \text{ cm}^{-3}$ ;  $[\text{syn-CH}_3\text{CHOO}] \sim (2.44 \pm 0.75) \times 10^{12} \text{ cm}^{-3}$ ;  $[\text{O}_2] = 2.50 \times 10^{16} \text{ cm}^{-3}$ ;  $[\text{CH}_2=\text{CHCHO}] \sim 2.42 \times 10^{15} \text{ cm}^{-3}$ ;  $I_{248} \sim 15 \text{ mJ cm}^{-2}$ .

| Exp # | $(k_{10} + k'_{11} + k'_{12}) \text{ s}^{-1}$<br>a | $A_1$<br>(fix) | fix $A_1$ and $k'_{14}$<br>$k'_{14} = 44857 \text{ s}^{-1}$ |                                                  |       |
|-------|----------------------------------------------------|----------------|-------------------------------------------------------------|--------------------------------------------------|-------|
|       |                                                    |                | $A_0$                                                       | $k_{10} + k'_{11} + k'_{12}$<br>$/\text{s}^{-1}$ | $R^2$ |
| 2-9-6 | 755                                                | 0              | 10202                                                       | 755                                              | 0.997 |
|       |                                                    | 1000           | 10207                                                       | 755                                              | 0.998 |
|       |                                                    | 5000           | 10228                                                       | 758                                              | 0.998 |
|       |                                                    | 10000          | 10254                                                       | 761                                              | 0.998 |
|       |                                                    | 30000          | 10359                                                       | 772                                              | 0.997 |

a. the fitted value of  $k_{10} + k'_{11} + k'_{12}$  when  $A_0$ ,  $A_1$ ,  $k_{10} + k'_{11} + k'_{12}$  and  $k'_{14}$  are floated during the fit.

## References

- 1 P. L. Luo, Y. Endo and Y. P. Lee, *J. Phys. Chem. Lett.*, 2018, **9**, 4391-4395.
- 2 X. Zhou, Y. Liu, W. Dong and X. Yang, *J. Phys. Chem. Lett.*, 2019, **10**, 4817-4821.
- 3 G. Schmitt and F. J. Comes, *J. Photochem.*, 1980, **14**, 107-123.
- 4 W. L. Ting, C. H. Chang, Y. F. Lee, H. Matsui, Y. P. Lee and J. J. Lin, *J. Chem. Phys.*, 2014, **141**, 104308.
- 5 N. U. M. Howes, Z. S. Mir, M. A. Blitz, S. Hardman, T. R. Lewis, D. Stone and P. W. Seakins, *Phys. Chem. Chem. Phys.*, 2018, **20**, 22218-22227.
- 6 L. Sheps, A. M. Scully and K. Au, *Phys. Chem. Chem. Phys.*, 2014, **16**, 26701-26706.
- 7 S. Zhang, R. Strekowski, L. Bosland, A. Monod and C. Zetzsch, *Phys. Chem. Chem. Phys.*, 2011, **13**, 11671-11677.
- 8 I. Magneron, R. Thevenet, A. Mellouki and G. L. Bras, *J. Phys. Chem. A*, 2002, **106**, 2526-2537.
